# Supplementary material for: Development of Guanidine-Bisurea Bifunctional Organocatalysts with a Chiral Pyrrolidine Moiety and Application to α-Hydroxylation of Tetralone-Derived β-Keto Esters
Source: MDPI journal article supplement (doi:10.3390/molecules200712590), 2015-07-10
Supplement: s1 [file s1]

# Supplementary Materials

$^1\text{H}$ - and  $^{13}\text{C}$ -NMR data for chiral pyrrolidine-derived guanidine-bisurea bifunctional organocatalysts **5a**–**j**

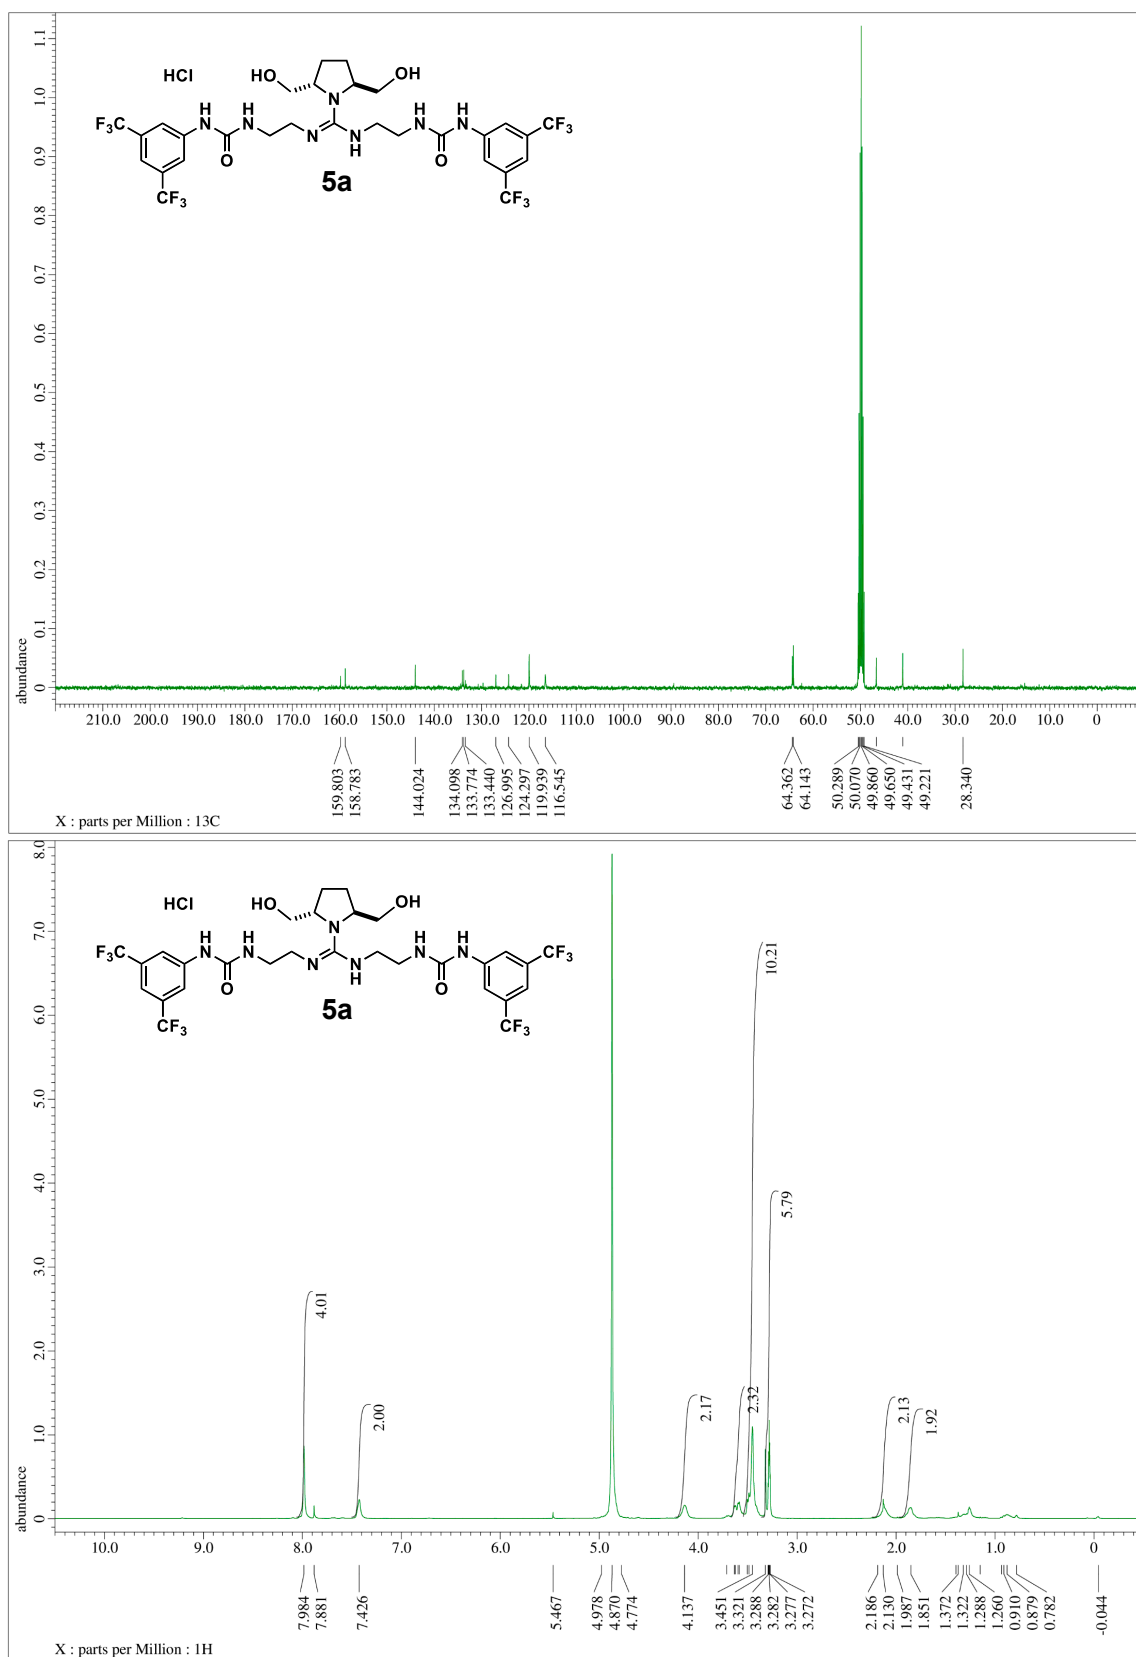

Figure S1. Copies of NMR spectra of **5a**.

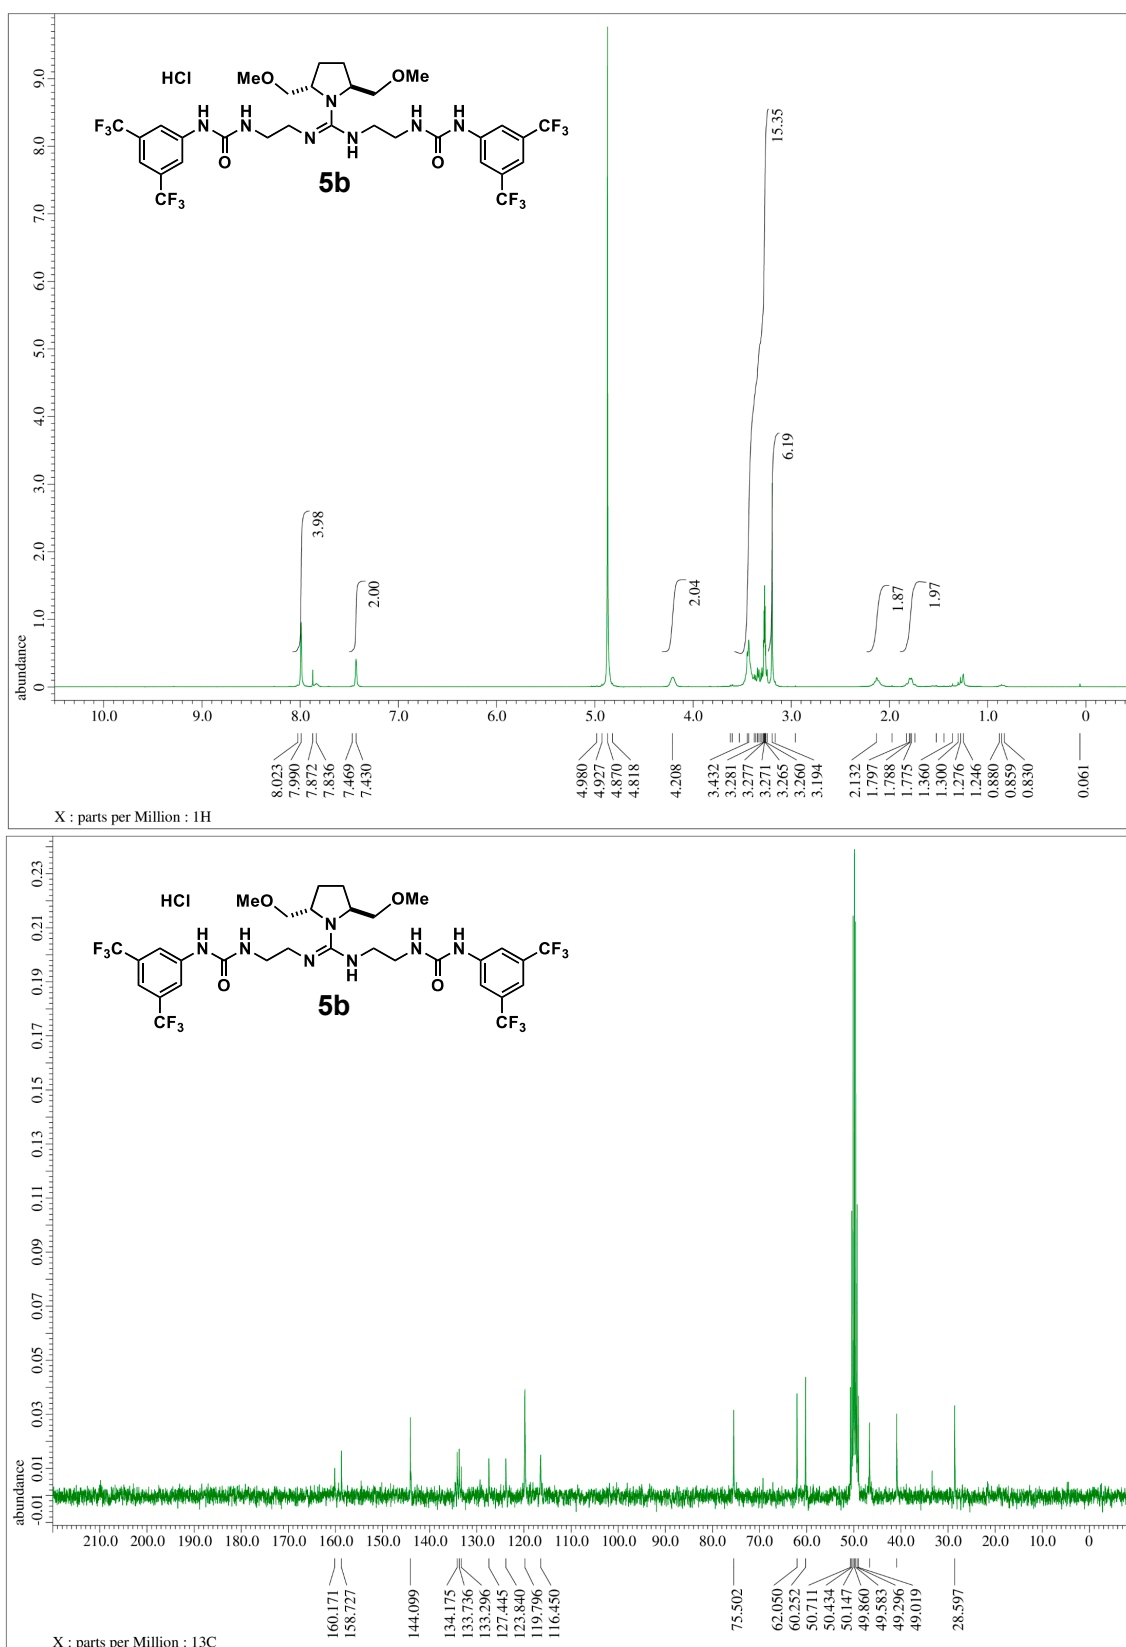

Figure S2. Copies of NMR spectra of **5b**.

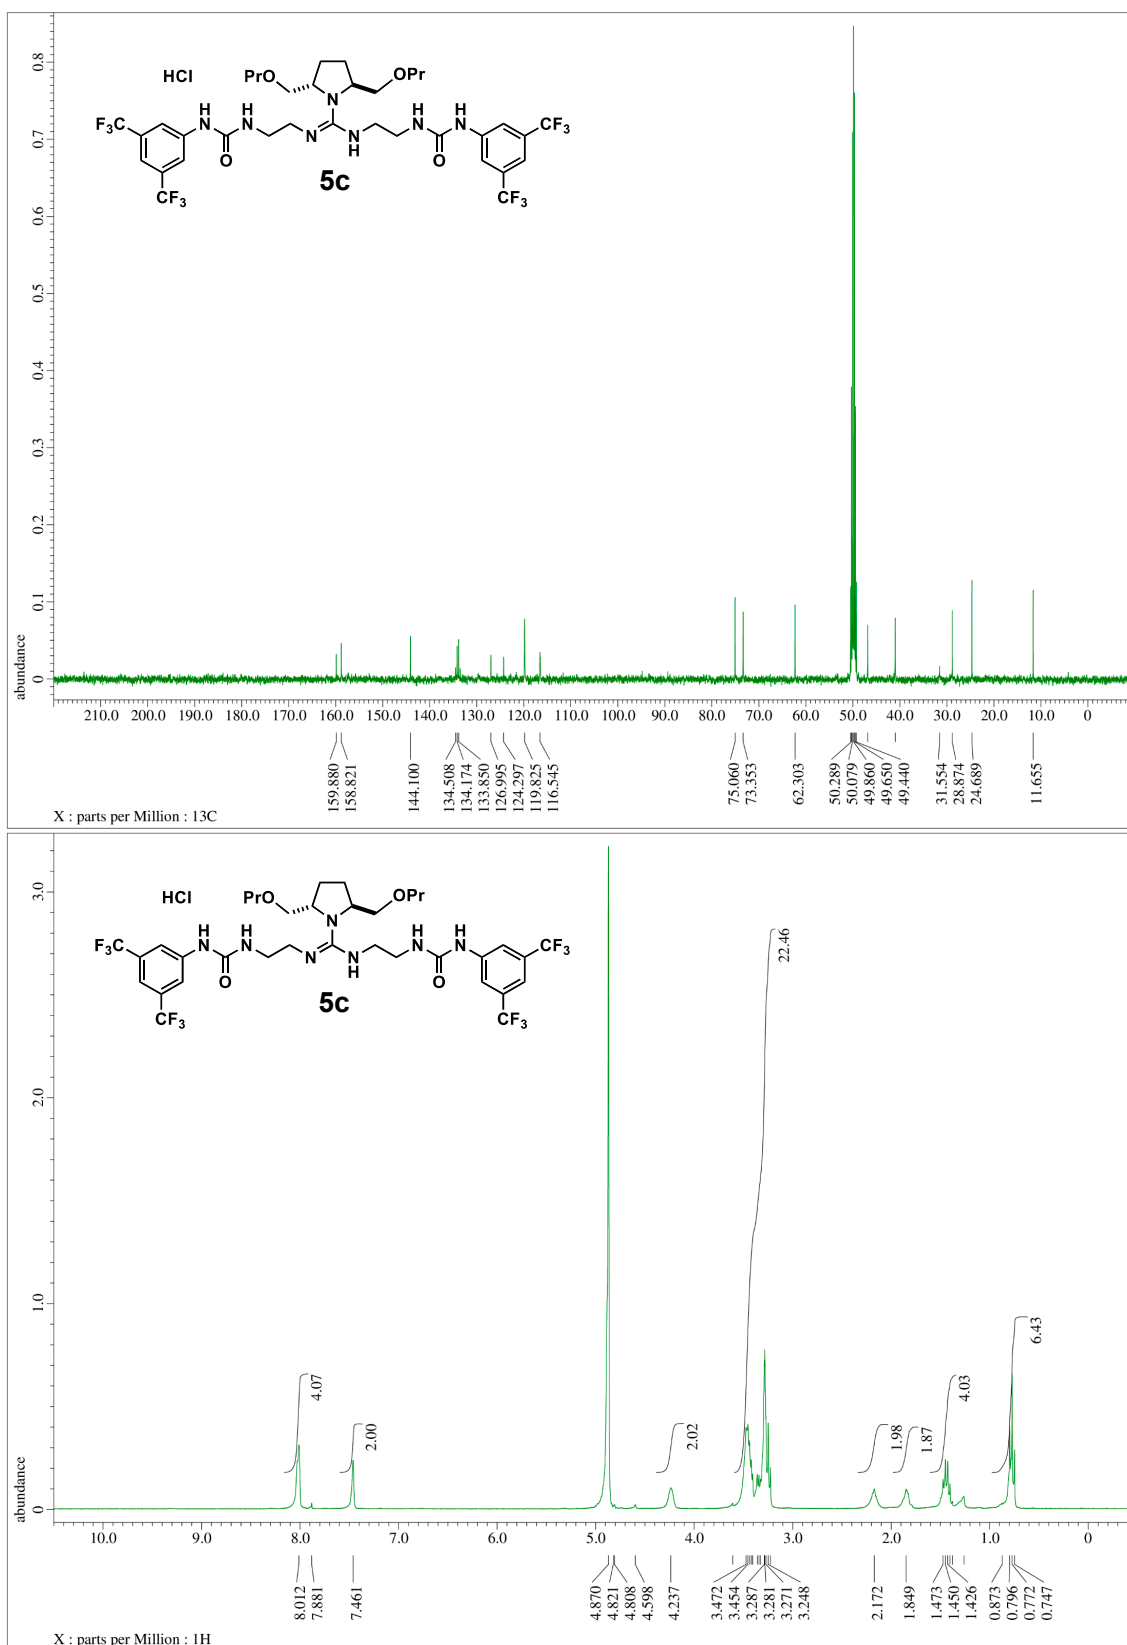

Figure S3. Copies of NMR spectra of 5c.

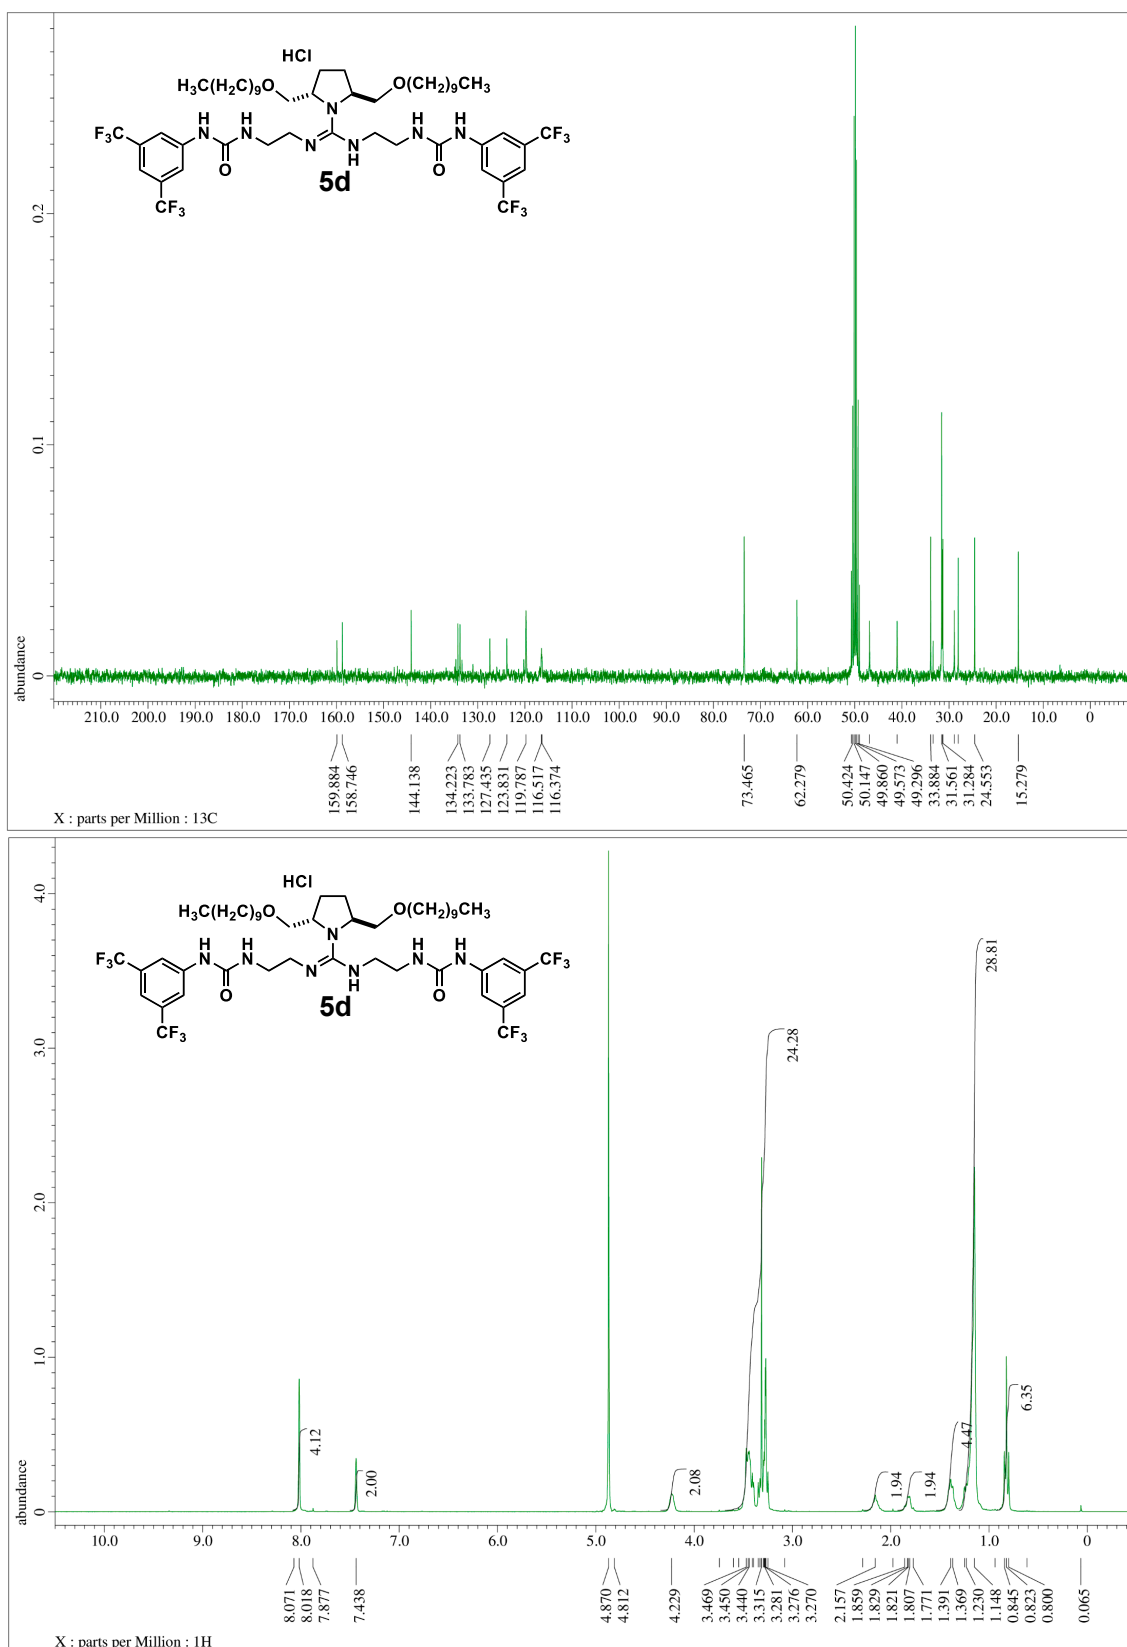

Figure S4. Copies of NMR spectra of **5d**.

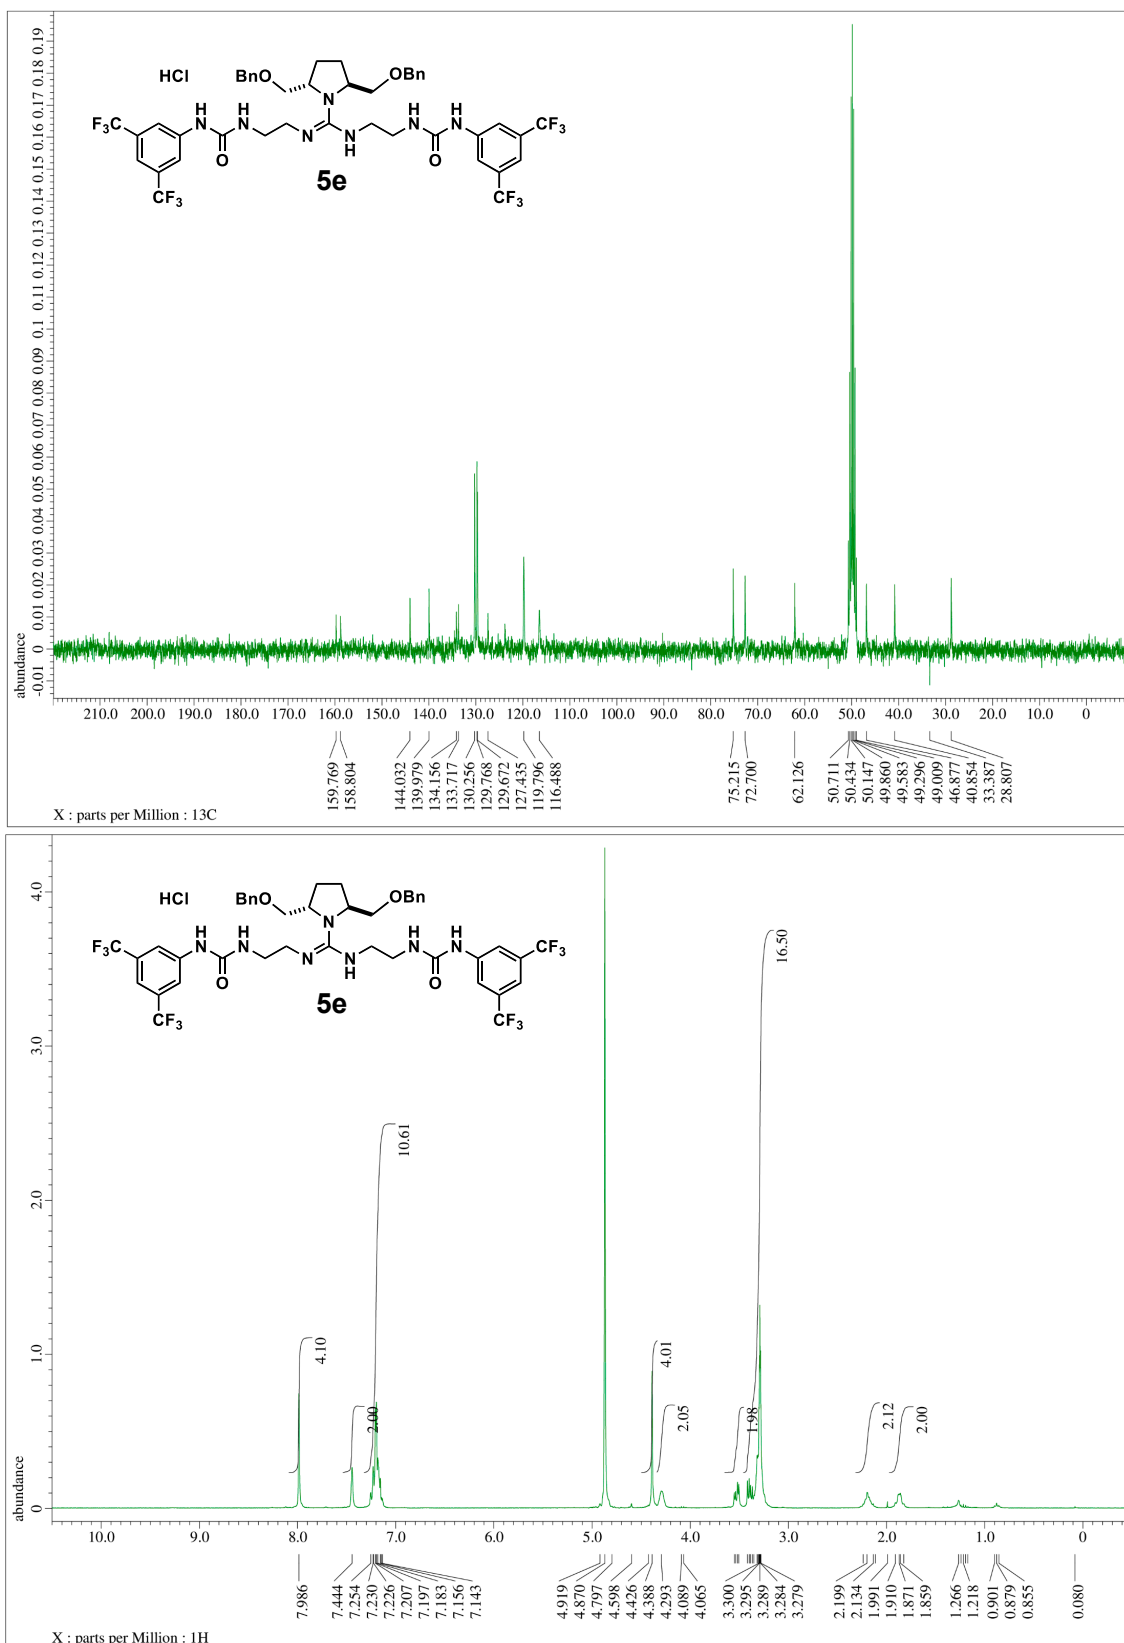Figure S5. Copies of NMR spectra of **5e**.

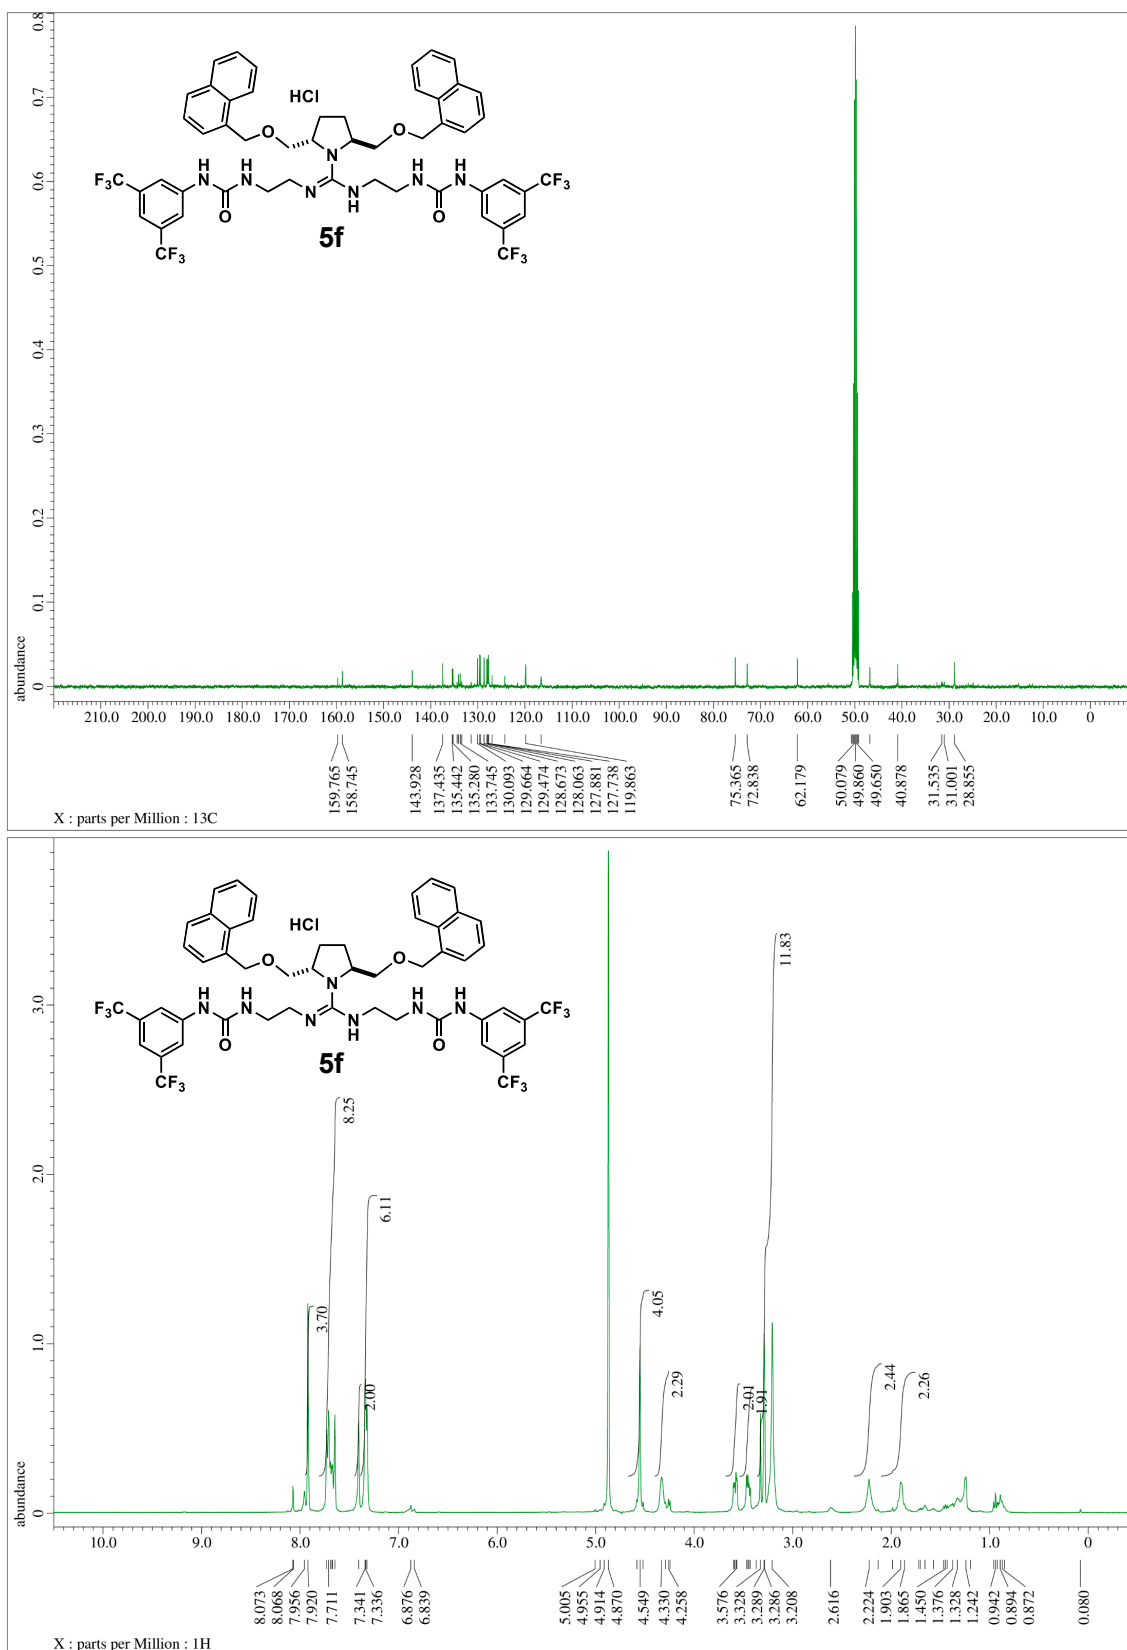

Figure S6. Copies of NMR spectra of **5f**.

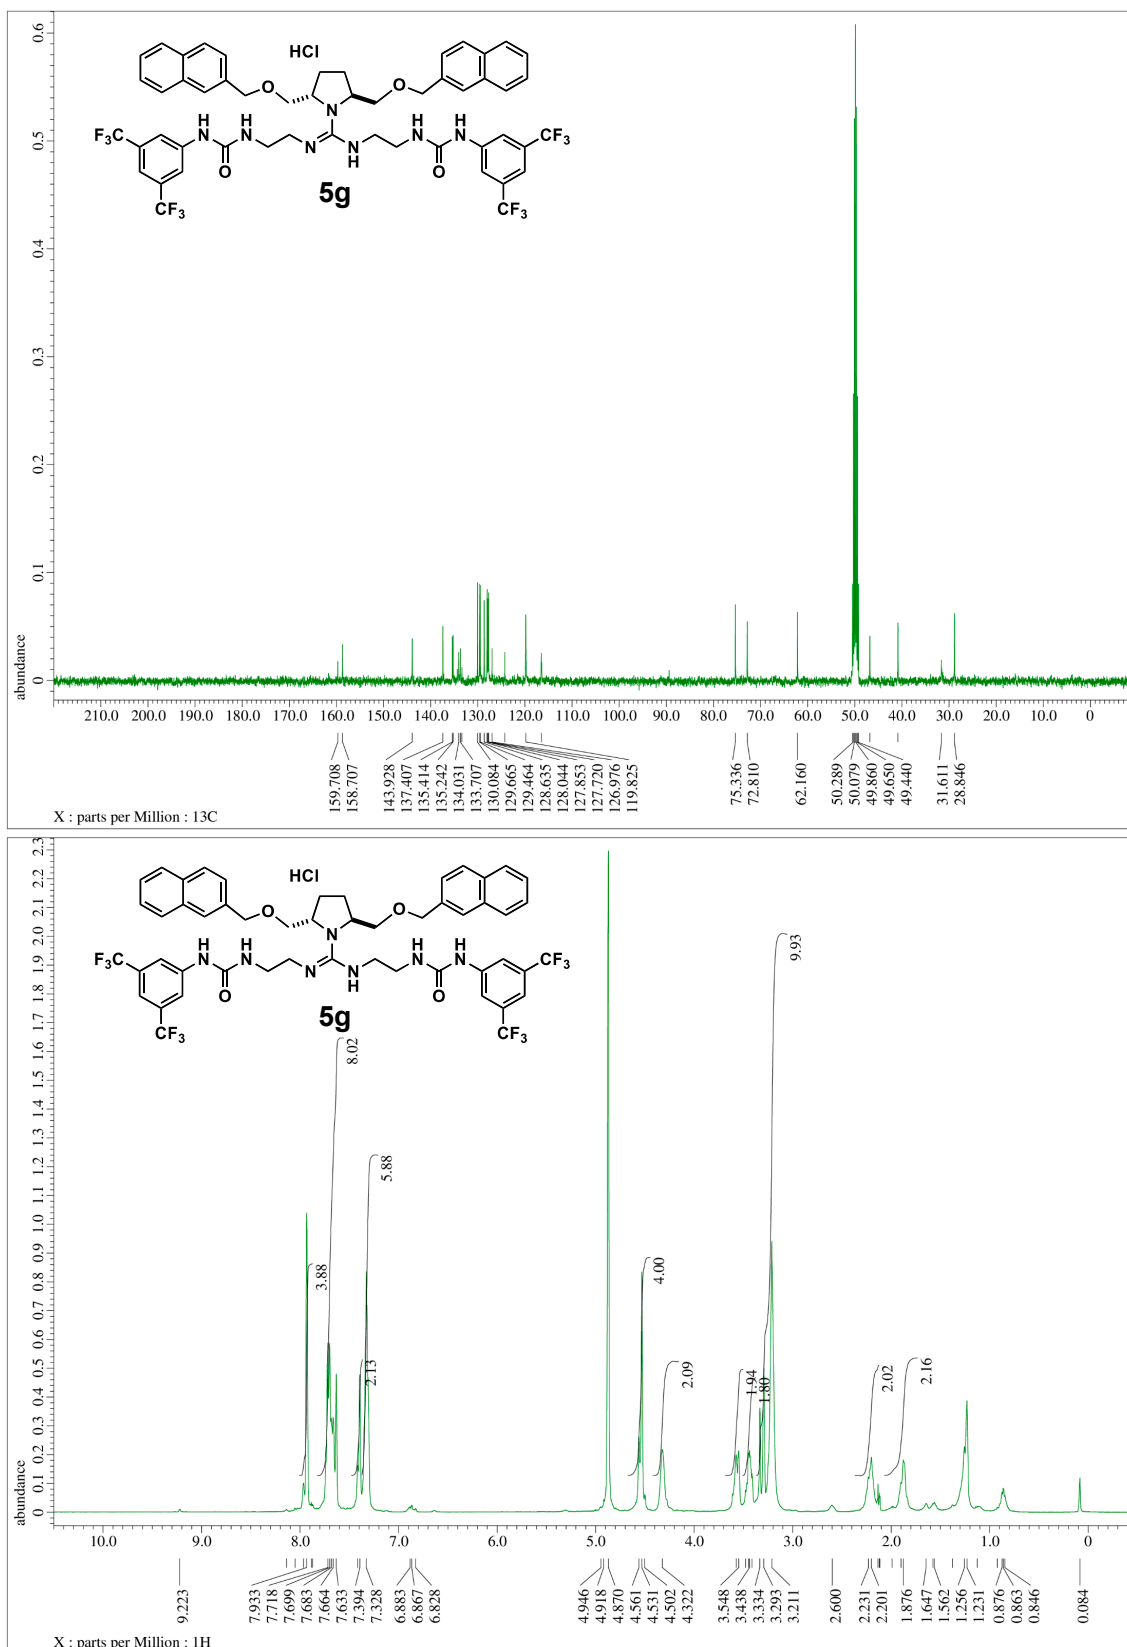

Figure S7. Copies of NMR spectra of **5g**.

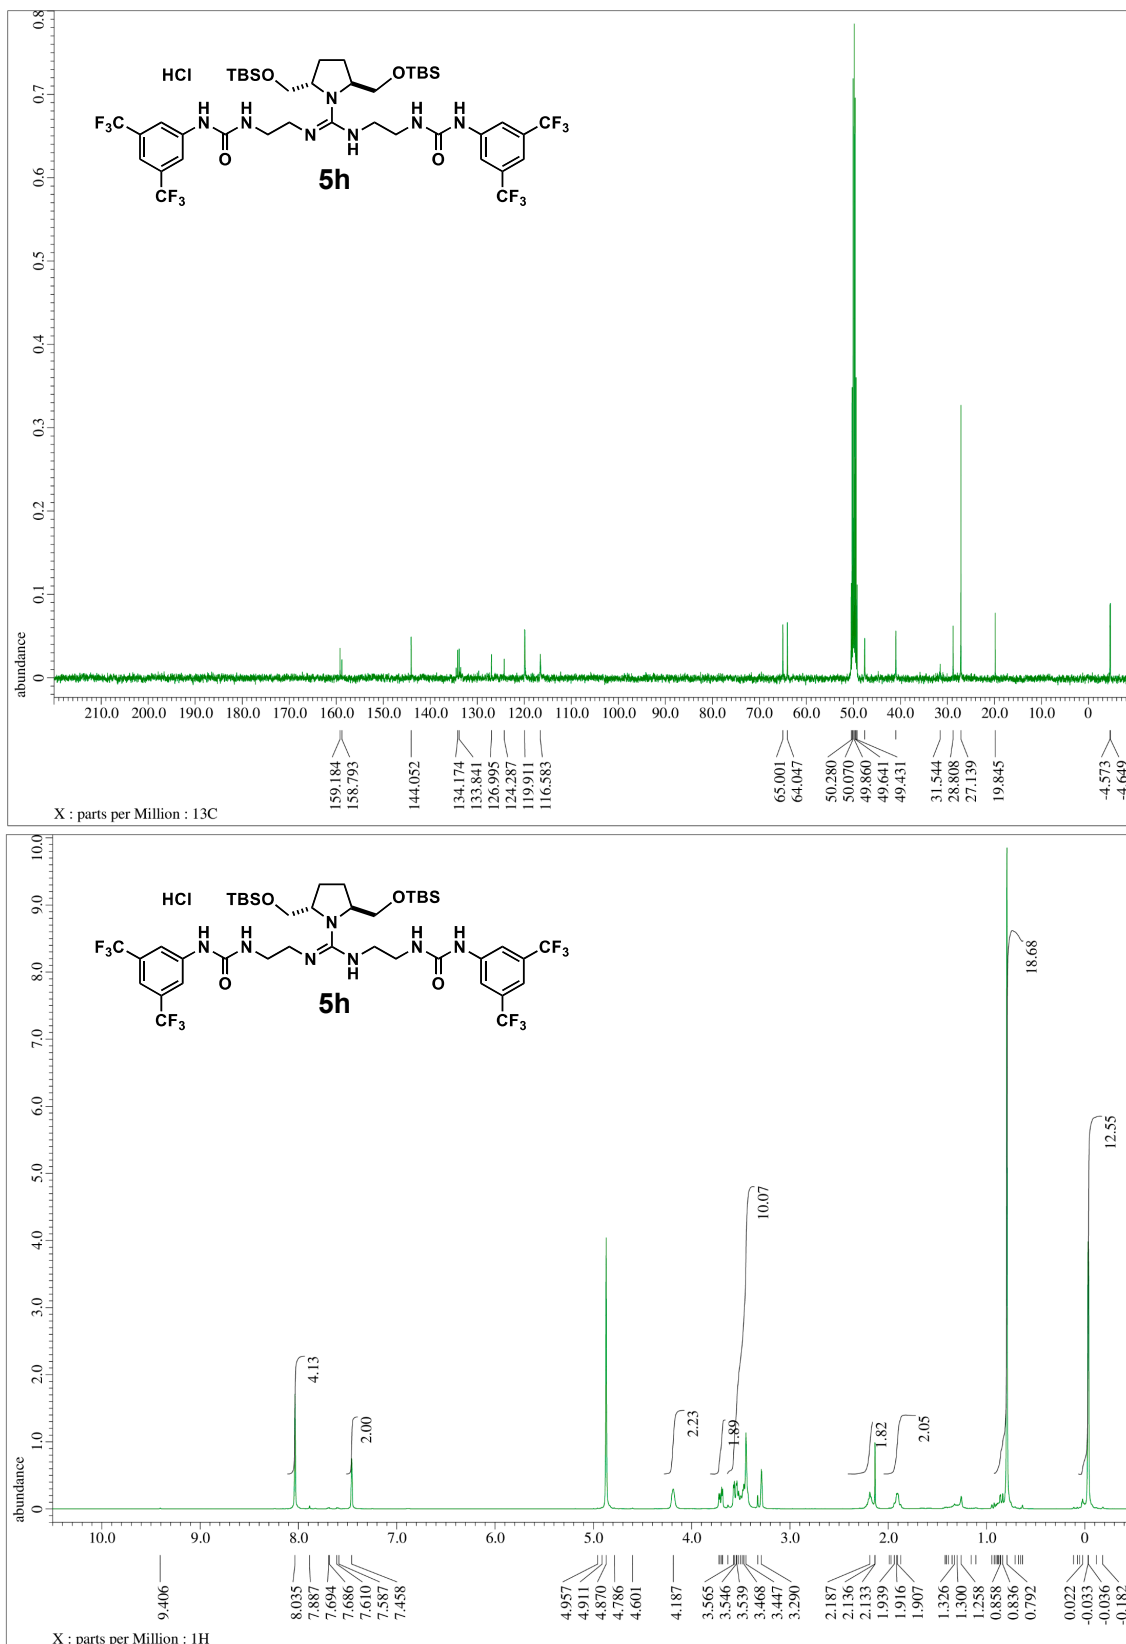

Figure S8. Copies of NMR spectra of 5h.



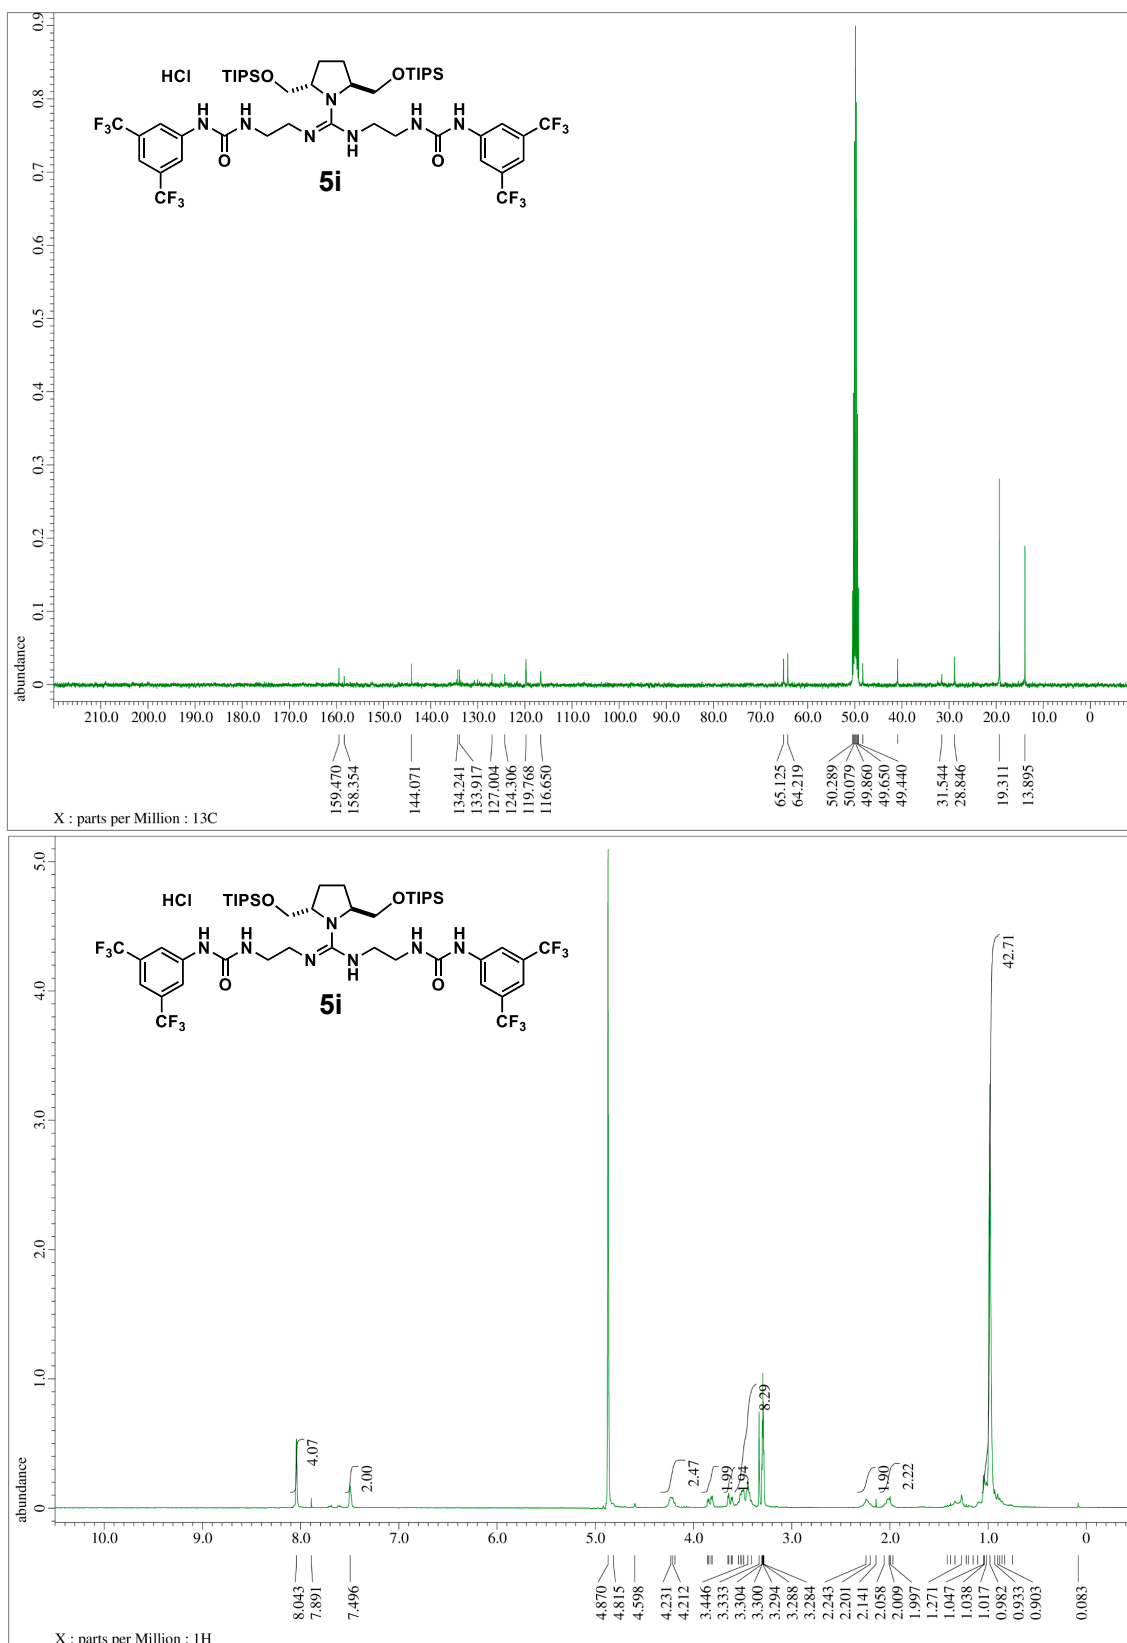

Figure S9. Copies of NMR spectra of **5i**.

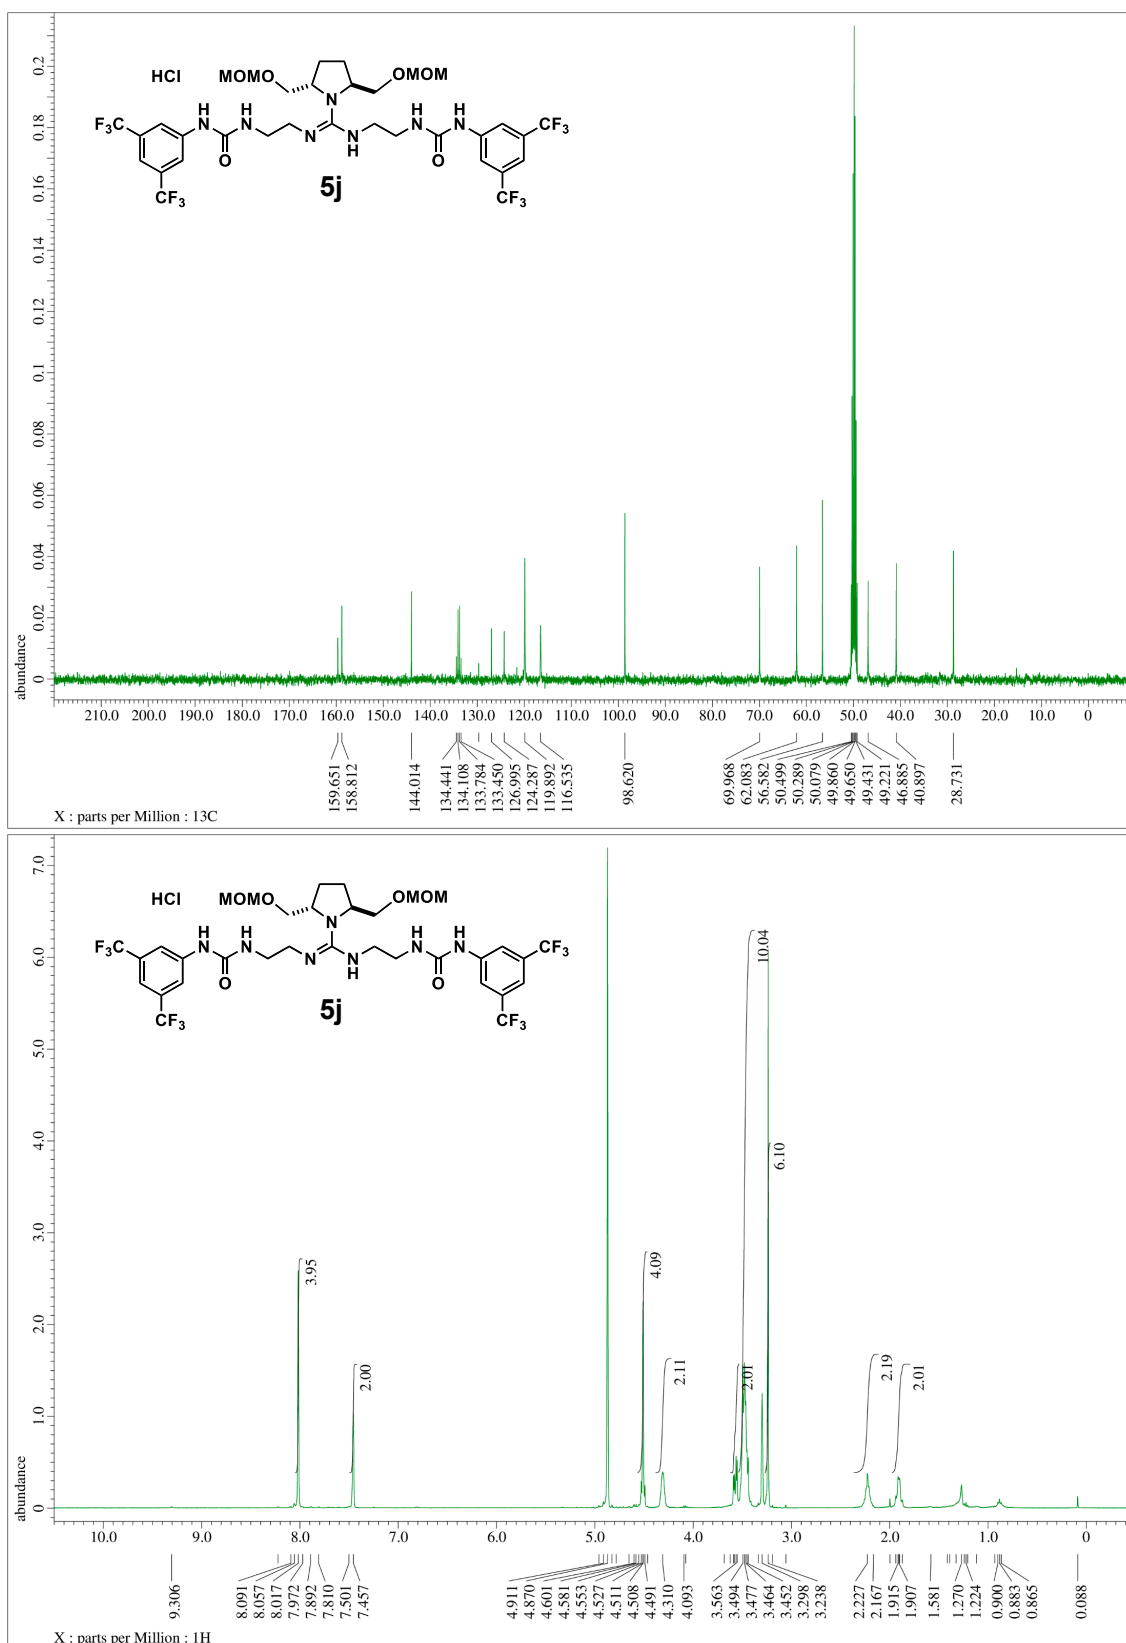

**Figure S10.** Copies of NMR spectra of **5j**.
